# Supplementary material for: Burkholderiales participating in pentachlorophenol biodegradation in iron-reducing paddy soil as identified by stable isotope probing
Source: Royal Society of Chemistry journal article supplement (doi:10.1039/c4em00530a), 2015-01-01
Supplement: c4em00530a1.pdf [file c4em00530a1.pdf]

***Burkholderiales* participating in pentachlorophenol biodegradation in iron-reducing  
paddy soil as identified by stable isotope probing**

Hui Tong <sup>a,b,c,1</sup>, Min Hu <sup>b,1</sup>, Fangbai Li <sup>\*b</sup>, Manjia Chen <sup>b</sup>, Yahui Lv <sup>b,d</sup>

<sup>a</sup> Guangzhou Institute of Geochemistry, Chinese Academy of Sciences, Guangzhou 510640,  
PR China

<sup>b</sup> Guangdong Key Laboratory of Agricultural Environment Pollution Integrated Control,  
Guangdong Institute of Eco-Environmental and Soil Sciences, Guangzhou 510650, PR China

<sup>c</sup> Graduate University of Chinese Academy of Sciences, Beijing 100049, PR China

<sup>d</sup> School of Chemical and Environmental Engineering, Shanghai Institute of Technology,  
Shanghai 201418, PR China

\* **Corresponding author.** Tel.: +86 20 87024721; fax: +86 20 87024123.

**E-mail address:** cefbli@soil.gd.cn (F.B., Li).

<sup>1</sup>These authors contributed equally to this work.

Number of pages: 5

Number of figures: 1

Number of tables: 2

**Figure S1** The relative abundance of T-RFs in the  $^{13}\text{C}$ -DNA heavy fractions. The solid line is the model-fitted relative abundance using the pseudo-first-order kinetic model.

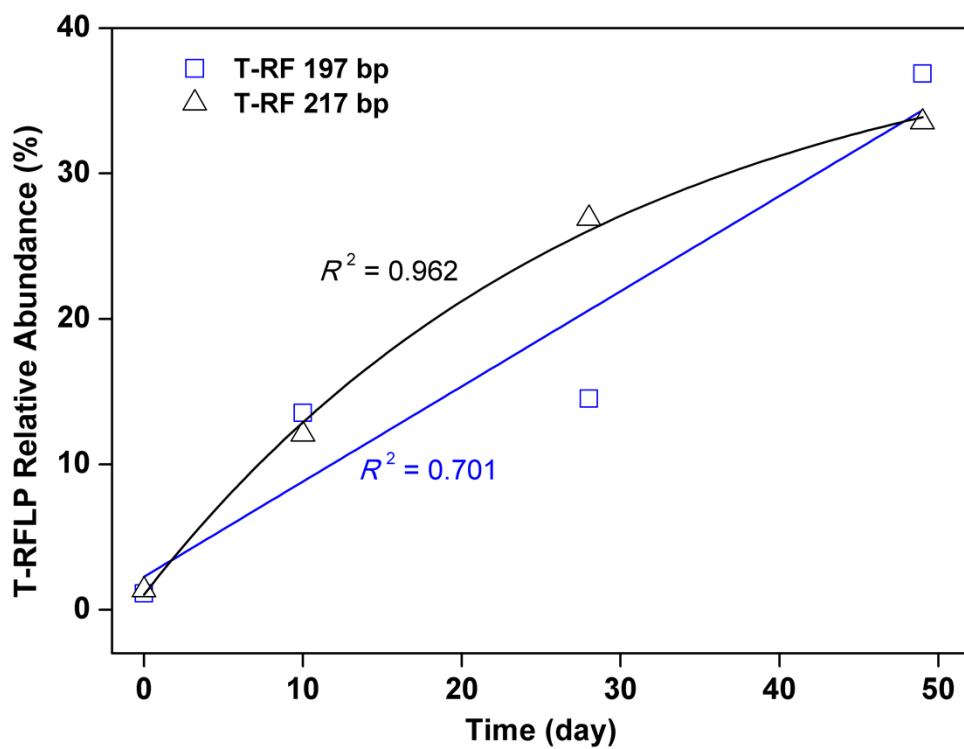

**Table S1.** Phylogenetic affiliation of two (A and B) 16S *rRNA* clone in PCP degrading microcosms.

A

| <sup>12</sup> C-Heavy fraction<br>of clones | Phylum                | Class                      | Order                      | Family                    | Genus                       |
|---------------------------------------------|-----------------------|----------------------------|----------------------------|---------------------------|-----------------------------|
| 8                                           | <i>Proteobacteria</i> | <i>Gammaproteobacteria</i> | <i>Enterobacteriales</i>   | <i>Enterobacteriaceae</i> | <i>Escherichia/Shigella</i> |
| 7                                           | <i>Proteobacteria</i> | <i>Betaproteobacteria</i>  | Unclassified               |                           |                             |
| 4                                           | <i>Planctomycetes</i> | <i>Planctomycetacia</i>    | <i>Planctomycetales</i>    | <i>Planctomycetaceae</i>  | <i>Unclassified</i>         |
| 3                                           | <i>Proteobacteria</i> | <i>Gammaproteobacteria</i> | <i>Enterobacteriales</i>   | <i>Enterobacteriaceae</i> | Unclassified                |
| 2                                           | <i>Acidobacteria</i>  | <i>Acidobacteria_Gp10</i>  |                            |                           | <i>Gp10</i>                 |
| 2                                           | <i>Acidobacteria</i>  | Unclassified               |                            |                           |                             |
| 2                                           | <i>Proteobacteria</i> | <i>Deltaproteobacteria</i> | <i>Desulfuromonadales</i>  | Unclassified              |                             |
| 2                                           | <i>Proteobacteria</i> | <i>Deltaproteobacteria</i> | <i>Nannocystineae</i>      | Unclassified              |                             |
| 1                                           | <i>Firmicutes</i>     | <i>Clostridia</i>          | <i>Clostridiales</i>       | <i>Peptococcaceae</i>     | Unclassified                |
| 1                                           | <i>Acidobacteria</i>  | <i>Acidobacteria_Gp3</i>   |                            |                           | Unclassified                |
| 1                                           | <i>Acidobacteria</i>  | <i>Acidobacteria_Gp1</i>   |                            |                           | <i>Gp1</i>                  |
| 1                                           | <i>Acidobacteria</i>  | <i>Acidobacteria_Gp23</i>  |                            |                           | <i>Gp23</i>                 |
| 1                                           | <i>Acidobacteria</i>  | <i>Acidobacteria_Gp6</i>   |                            |                           | <i>Gp6</i>                  |
| 1                                           | <i>Actinobacteria</i> | <i>Actinobacteria</i>      | <i>Acidimicrobiales</i>    | <i>Acidimicrobineae</i>   | Unclassified                |
| 1                                           | <i>Planctomycetes</i> | <i>Planctomycetacia</i>    | <i>Planctomycetales</i>    | <i>Planctomycetaceae</i>  | <i>Isosphaera</i>           |
| 1                                           | <i>Planctomycetes</i> | <i>Planctomycetacia</i>    | <i>Planctomycetales</i>    | <i>Planctomycetaceae</i>  | <i>Singulisphaera</i>       |
| 1                                           | <i>Proteobacteria</i> | <i>Alphaproteobacteria</i> | <i>Rhodospirillales</i>    | <i>Rhodospirillaceae</i>  | <i>Azospirillum</i>         |
| 1                                           | <i>Proteobacteria</i> | <i>Alphaproteobacteria</i> | <i>Rhodospirillales</i>    | <i>Acetobacteraceae</i>   | Unclassified                |
| 1                                           | <i>Proteobacteria</i> | <i>Alphaproteobacteria</i> | <i>Rhodospirillales</i>    | Unclassified              |                             |
| 1                                           | <i>Proteobacteria</i> | <i>Alphaproteobacteria</i> | <i>Rhizobiales</i>         | Unclassified              |                             |
| 1                                           | <i>Proteobacteria</i> | <i>Deltaproteobacteria</i> | <i>Syntrophobacterales</i> | <i>Syntrophaceae</i>      | <i>Syntrophus</i>           |
| 1                                           | <i>Proteobacteria</i> | <i>Deltaproteobacteria</i> | <i>Syntrophobacterales</i> | <i>Syntrophaceae</i>      | Unclassified                |
| 1                                           | <i>Proteobacteria</i> | <i>Gammaproteobacteria</i> | <i>Xanthomonadales</i>     | <i>Xanthomonadaceae</i>   | <i>Stenotrophomonas</i>     |
| 1                                           | <i>Proteobacteria</i> | <i>Gammaproteobacteria</i> | <i>Xanthomonadales</i>     | <i>Xanthomonadaceae</i>   | <i>Dyella</i>               |
| 1                                           | <i>Proteobacteria</i> | <i>Gammaproteobacteria</i> | <i>Xanthomonadales</i>     | <i>Xanthomonadaceae</i>   | Unclassified                |
| 1                                           | <i>Proteobacteria</i> | <i>Gammaproteobacteria</i> | Unclassified               |                           |                             |
| 1                                           | <i>Proteobacteria</i> | <i>Betaproteobacteria</i>  | <i>Burkholderiales</i>     | <i>Comamonadaceae</i>     | <i>Delftia</i>              |
| 1                                           | <i>Proteobacteria</i> | Unclassified               |                            |                           |                             |
| 5                                           | Unclassified          |                            |                            |                           |                             |

B

---

<sup>13</sup>C-Heavy fraction

| of clones | Phylum                | Class                      | Order                      | Family                      | Genus                       |
|-----------|-----------------------|----------------------------|----------------------------|-----------------------------|-----------------------------|
| 8         | <i>Proteobacteria</i> | <i>Gammaproteobacteria</i> | <i>Enterobacteriales</i>   | <i>Enterobacteriaceae</i>   | Unclassified                |
| 6         | <i>Proteobacteria</i> | <i>Betaproteobacteria</i>  | <i>Burkholderiales</i>     | <i>Alcaligenaceae</i>       | <i>Achromobacter</i>        |
| 5         | <i>Proteobacteria</i> | <i>Betaproteobacteria</i>  | Unclassified               |                             |                             |
| 4         | <i>Proteobacteria</i> | <i>Gammaproteobacteria</i> | <i>Xanthomonadales</i>     | <i>Xanthomonadaceae</i>     | <i>Stenotrophomonas</i>     |
| 3         | <i>Proteobacteria</i> | <i>Gammaproteobacteria</i> | <i>Enterobacteriales</i>   | <i>Enterobacteriaceae</i>   | <i>Escherichia/Shigella</i> |
| 4         | <i>Proteobacteria</i> | <i>Gammaproteobacteria</i> | <i>Pseudomonadales</i>     | <i>Moraxellaceae</i>        | <i>Acinetobacter</i>        |
| 4         | <i>Proteobacteria</i> | <i>Betaproteobacteria</i>  | <i>Burkholderiales</i>     | <i>Comamonadaceae</i>       | <i>Comamonas</i>            |
| 3         | <i>Proteobacteria</i> | <i>Betaproteobacteria</i>  | <i>Burkholderiales</i>     | <i>Alcaligenaceae</i>       | <i>Bordetella</i>           |
| 2         | <i>Firmicutes</i>     | <i>Clostridia</i>          | <i>Clostridiales</i>       | <i>Ruminococcaceae</i>      | Unclassified                |
| 2         | <i>Proteobacteria</i> | <i>Deltaproteobacteria</i> | <i>Desulfuromonadales</i>  | <i>Geobacteraceae</i>       | <i>Geobacter</i>            |
| 2         | <i>Proteobacteria</i> | <i>Betaproteobacteria</i>  | <i>Burkholderiales</i>     | Unclassified                |                             |
| 1         | <i>Actinobacteria</i> | <i>Actinobacteria</i>      | <i>Actinomycetales</i>     | <i>Propionibacteriaceae</i> | <i>Propionibacterium</i>    |
| 1         | <i>Cyanobacteria</i>  | <i>Chloroplast</i>         | <i>Chloroplast</i>         | <i>Chloroplast</i>          | Unclassified                |
| 1         | <i>Acidobacteria</i>  | <i>Acidobacteria_GpI</i>   |                            |                             | <i>GpI</i>                  |
| 1         | <i>Firmicutes</i>     | <i>Clostridia</i>          | <i>Clostridiales</i>       | <i>Peptococcaceae 2</i>     | Unclassified                |
| 1         | <i>Proteobacteria</i> | <i>Alphaproteobacteria</i> | Unclassified               |                             |                             |
| 1         | <i>Proteobacteria</i> | <i>Deltaproteobacteria</i> | <i>Syntrophobacterales</i> | <i>Syntrophobacteraceae</i> | <i>Desulforhabdus</i>       |
| 1         | <i>Proteobacteria</i> | <i>Deltaproteobacteria</i> | <i>Syntrophobacterales</i> | <i>Syntrophobacteraceae</i> | Unclassified                |
| 1         | <i>Proteobacteria</i> | <i>Gammaproteobacteria</i> | <i>Xanthomonadales</i>     | <i>Xanthomonadaceae</i>     | Unclassified                |
| 1         | <i>Proteobacteria</i> | <i>Gammaproteobacteria</i> | <i>Enterobacteriales</i>   | <i>Enterobacteriaceae</i>   | <i>Serratia</i>             |
| 1         | <i>Proteobacteria</i> | <i>Gammaproteobacteria</i> | Unclassified               |                             |                             |
| 1         | <i>Proteobacteria</i> | <i>Betaproteobacteria</i>  | <i>Burkholderiales</i>     | <i>Oxalobacteraceae</i>     | <i>Duganella</i>            |
| 1         | <i>Proteobacteria</i> | <i>Betaproteobacteria</i>  | <i>Hydrogenophilales</i>   | <i>Hydrogenophilaceae</i>   | <i>Thiobacillus</i>         |
| 1         | Unclassified          |                            |                            |                             |                             |

---

**Table S2.** Comparison of dominant T-RF fragments (bp) of 16S *rRNA* in heavy fraction to predicted fragment with clone library sequences.

|                     | <i>Hae</i> III | <i>Alu</i> I | <i>Hha</i> I | <i>Rsa</i> I |
|---------------------|----------------|--------------|--------------|--------------|
| affiliated sequence |                |              |              |              |
| T-RF (bp)           | 197            | 236          | 209          | 475          |
| clones              | 202            | 234          | 212          | 476          |
| affiliated sequence |                |              |              |              |
| T-RF (bp)           | 217            | 155          | 570          | 475          |
| clones              | 221            | 157          | 571          | 475          |
